# Supplementary material
Source: Springer Nature journal article supplement (https://www.springerprofessional.de/resource/supplementary/13638_2012_462_MOESM3_ESM.pdf/11897800)

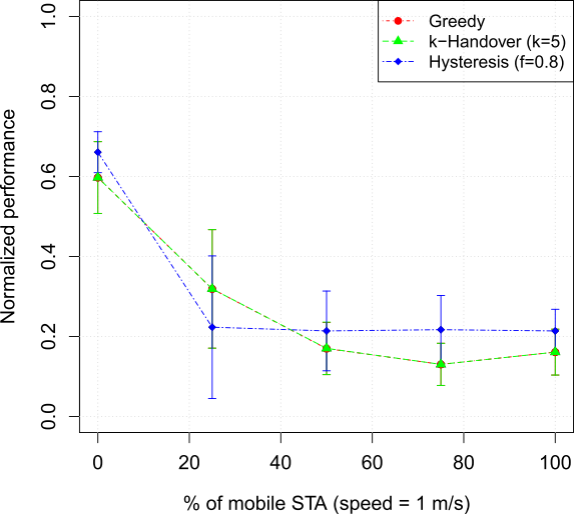

Supplement: MOESM3 [file 11897800]
